# Supplementary material for: TRIM28 modulates nuclear receptor signaling to regulate uterine function
Source: PubMed Central journal article supplement (PMC10393996; doi:10.1038/s41467-023-40395-7), 2023-08-01

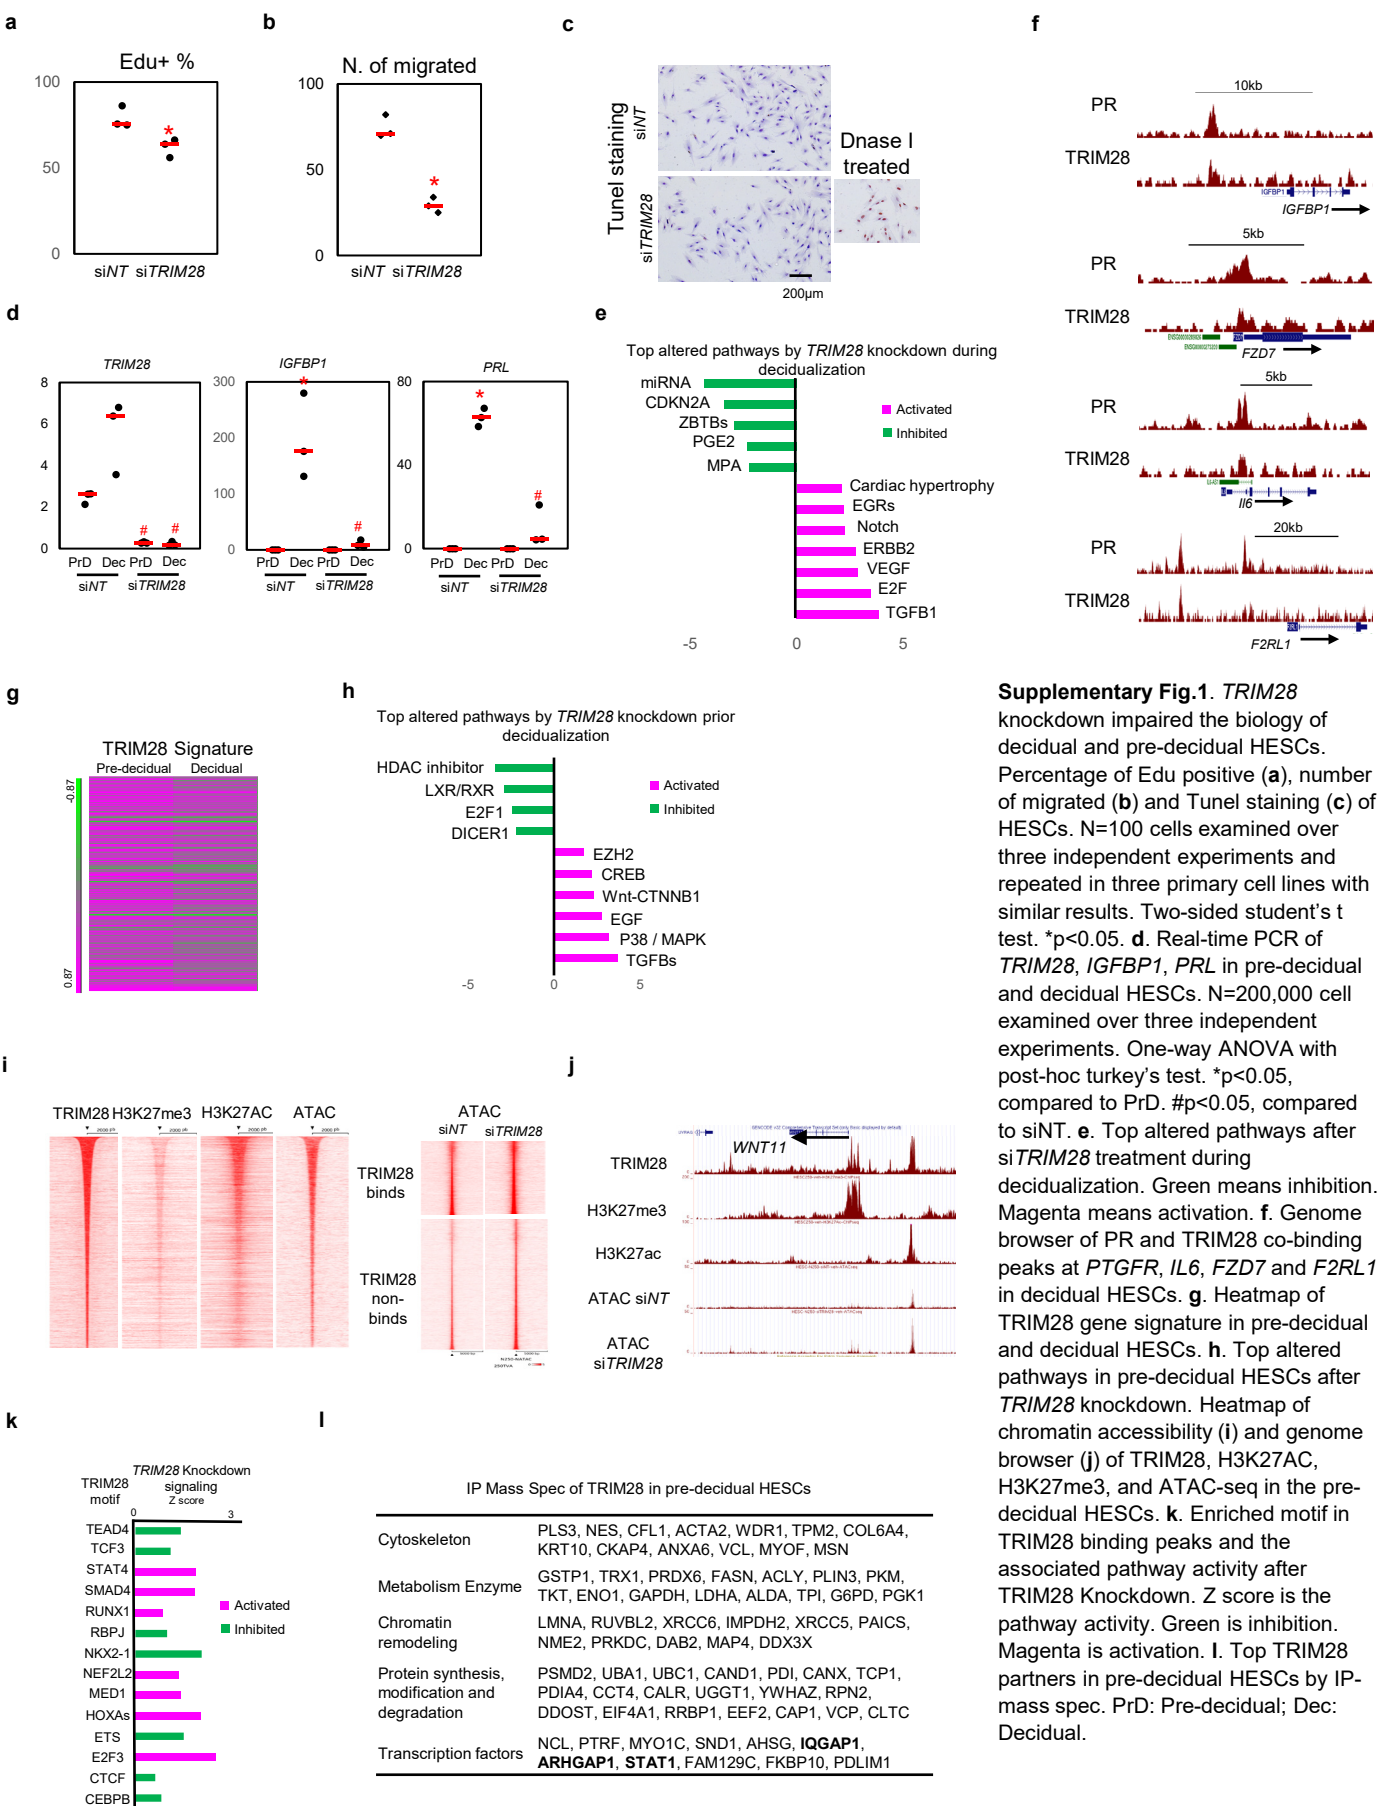

**Supplementary Fig.1. TRIM28** knockdown impaired the biology of decidual and pre-decidual HESCs. Percentage of Edu positive (a), number of migrated (b) and TUNEL staining (c) of HESCs. N=100 cells examined over three independent experiments and repeated in three primary cell lines with similar results. Two-sided student's t test. \* $p < 0.05$ . d. Real-time PCR of *TRIM28*, *IGFBP1*, *PRL* in pre-decidual and decidual HESCs. N=200,000 cell examined over three independent experiments. One-way ANOVA with post-hoc turkey's test. \* $p < 0.05$ , compared to PrD. # $p < 0.05$ , compared to siNT. e. Top altered pathways after siTRIM28 treatment during decidualization. Green means inhibition. Magenta means activation. f. Genome browser of PR and TRIM28 co-binding peaks at *PTGFR*, *IL6*, *FZD7* and *F2RL1* in decidual HESCs. g. Heatmap of TRIM28 gene signature in pre-decidual and decidual HESCs. h. Top altered pathways in pre-decidual HESCs after TRIM28 knockdown. Heatmap of chromatin accessibility (i) and genome browser (j) of TRIM28, H3K27AC, H3K27me3, and ATAC-seq in the pre-decidual HESCs. k. Enriched motif in TRIM28 binding peaks and the associated pathway activity after TRIM28 Knockdown. Z score is the pathway activity. Green is inhibition. Magenta is activation. l. Top TRIM28 partners in pre-decidual HESCs by IP-mass spec. PrD: Pre-decidual; Dec: Decidual.

**a**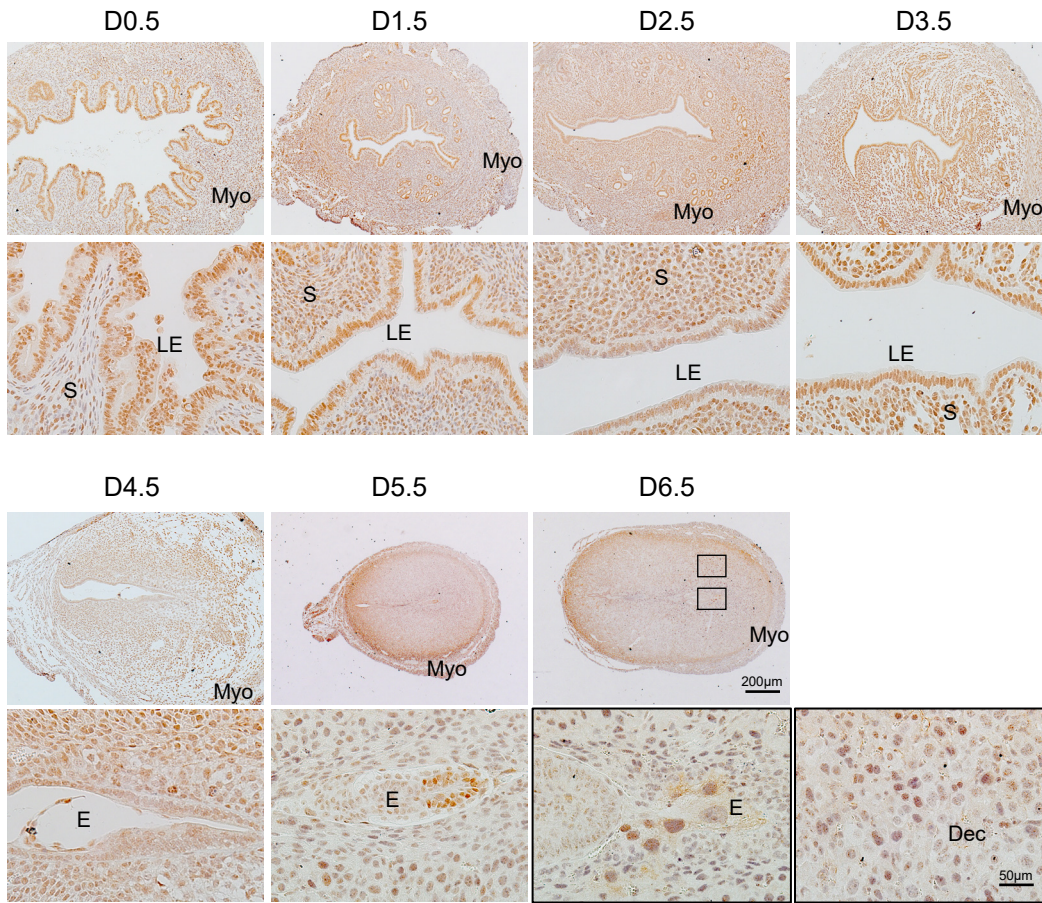**b**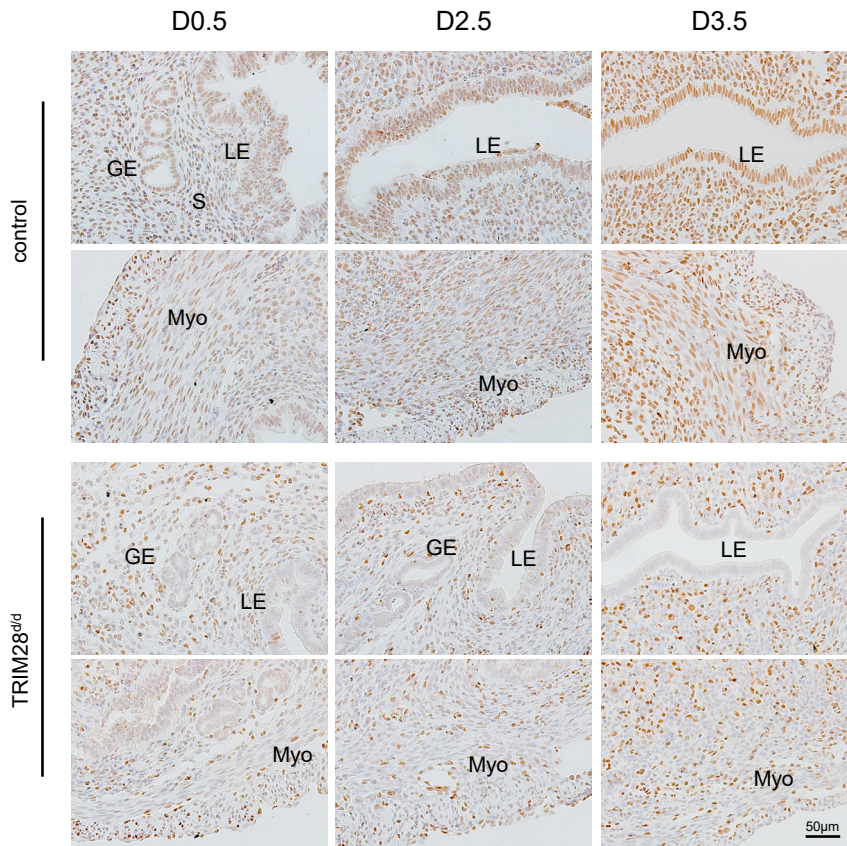

**Supplementary Fig 2.** TRIM28 expression in the *TRIM28<sup>fl/fl</sup>* and *TRIM28<sup>ΔΔ</sup>* mice during early pregnancy. **a.** Immunohistochemistry (IHC) of TRIM28 in the mouse uterus at D0.5-7.5. **b.** Immunohistochemistry of TRIM28 in *TRIM28<sup>fl/fl</sup>* and *TRIM28<sup>ΔΔ</sup>* mouse uterus at D0.5-3.5. E: Embryo; GE: Glandular epithelium; LE: Luminal epithelium; S: Stroma; Myo: Myometrium. The IHC was repeated in three different mice per group with similar results.

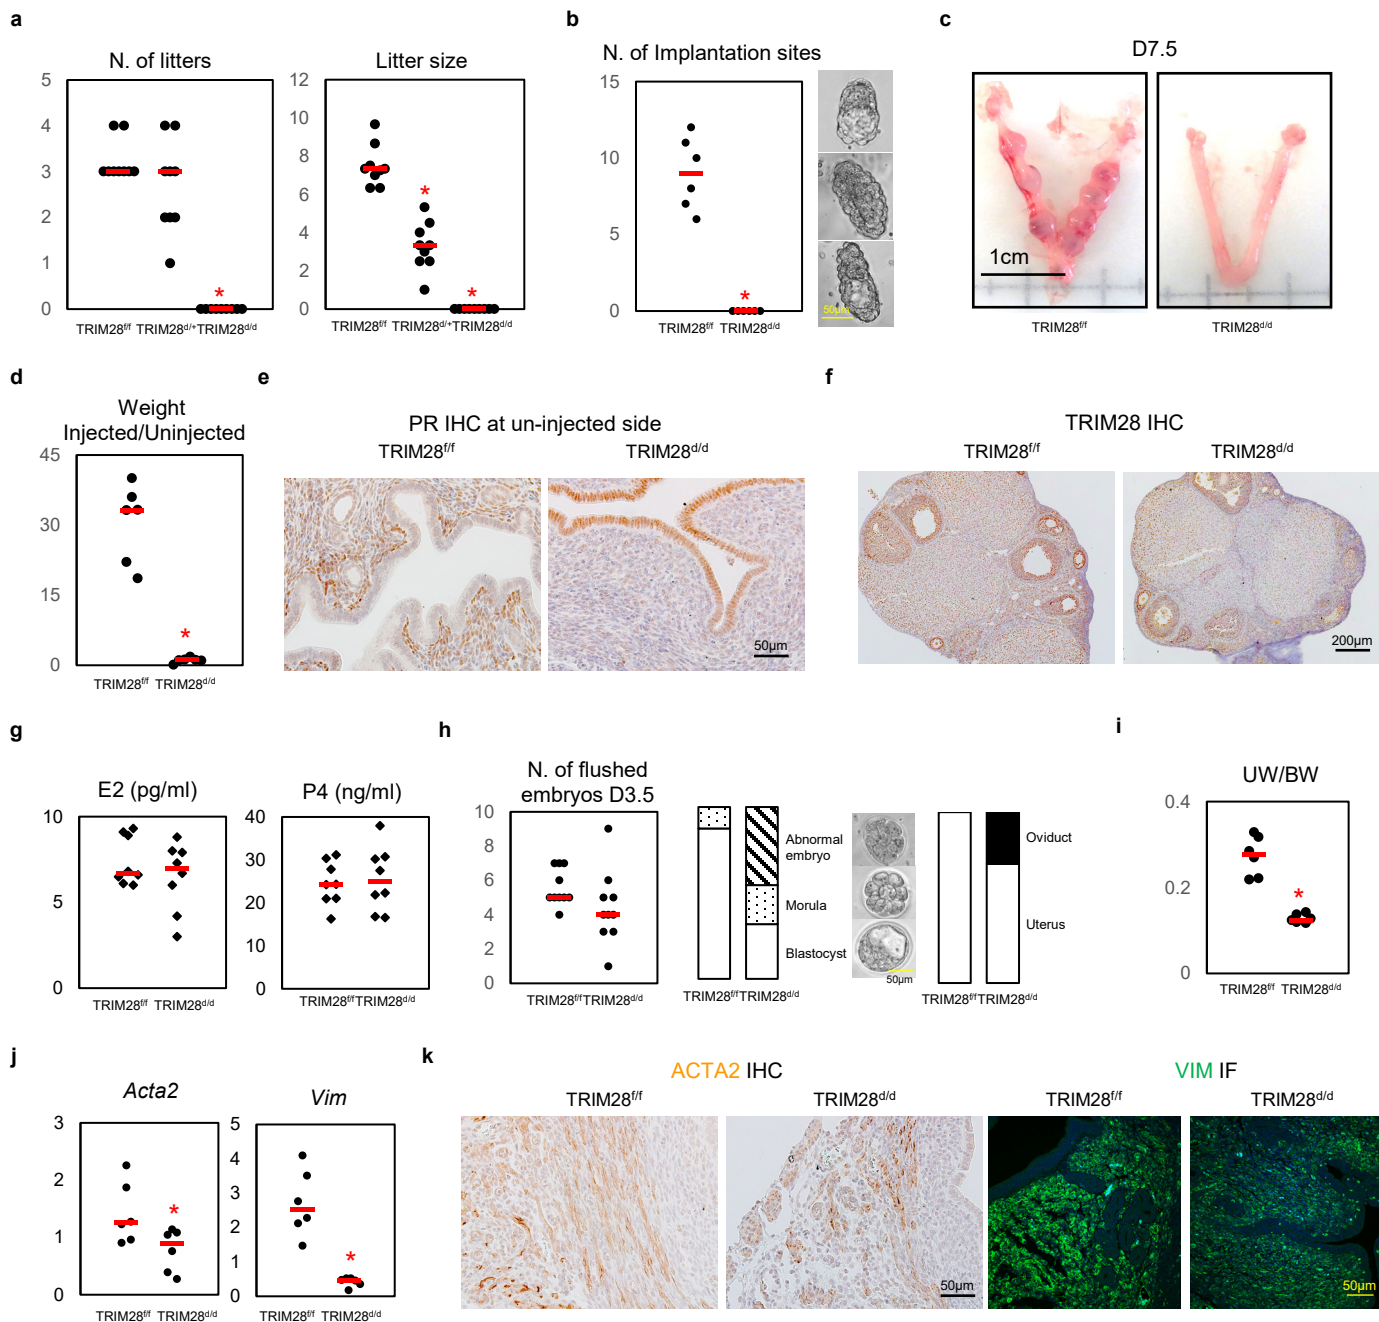

**Supplementary Fig. 3.** TRIM28<sup>d/d</sup> mice were infertile. **a**. The number of litter and litter size in the TRIM28<sup>ff</sup>, TRIM28<sup>d/+</sup> and TRIM28<sup>d/d</sup> mice after 6-month breeding trial. N=10 biologically independent samples per group. **b**. The number of embryo implantation sites in the TRIM28<sup>ff</sup> and TRIM28<sup>d/d</sup> mice at D4.5. Blastocysts with normal morphology were flushed out from the TRIM28<sup>d/d</sup> mice. N=6 biologically independent samples. **c**. The representative uterine pictures at D7.5. **d**. The weight ratio of oil injected over un-injected side uterus within the same mouse upon artificial decidualization. N=6 biologically independent samples per group. **e**. Immunohistochemistry of PR at un-injected side uterus. **f**. Immunohistochemistry of TRIM28 in mouse ovaries. **g**. Serum levels of 17 $\beta$ -estradiol (E2) and progesterone (P4). N=8 biologically independent samples per group. **h**. The number of flushed embryos from the D3.5 mouse uterus and oviduct. The percentage of blastocyst, morula and bad embryos from the flushed embryos. N=10 biologically independent samples per group. The percentage of embryos flushed out from the uterus or oviduct. **i**. The ratio of uterine weight over body weight. N=6 biologically independent samples per group. **j**. The real-time PCR of *Acta2* and *Vim* of the TRIM28<sup>ff</sup> and TRIM28<sup>d/d</sup> mice at 3.5. N=6 biologically independent samples per group. **k**. The immunohistochemistry (IHC) of ACTA2 and immunofluorescence (IF) of VIM. Two-sided student's t test. \*p<0.05. The IHC and IF were repeated in three different mice per group with similar results.

**a**

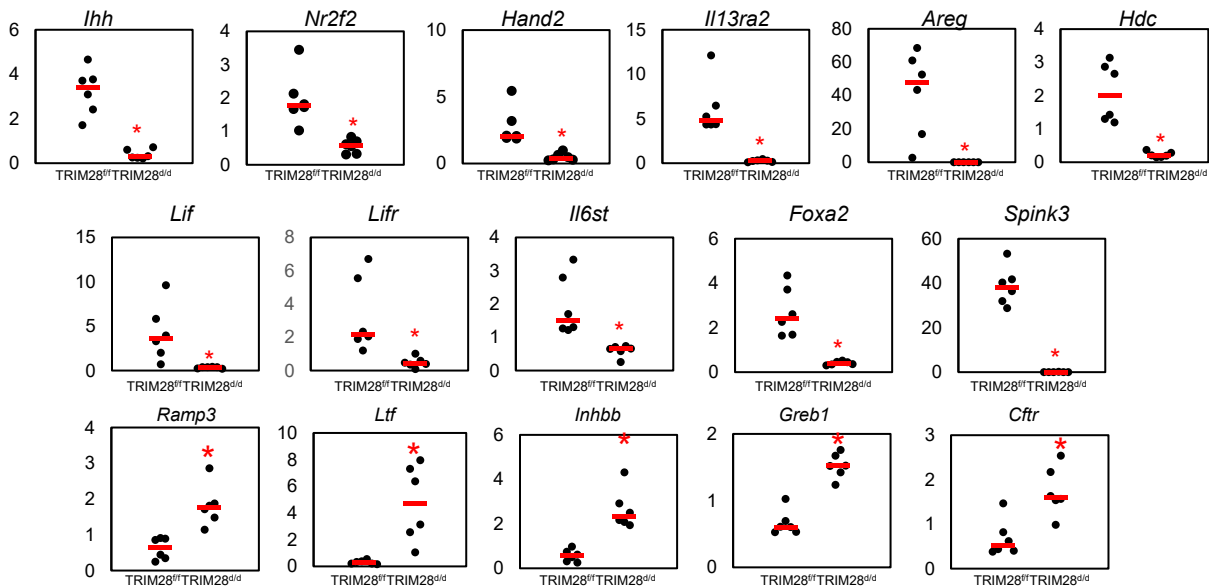

**b**

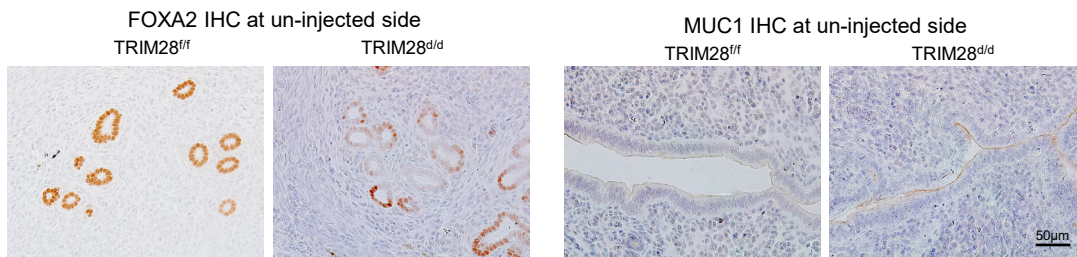

**c**

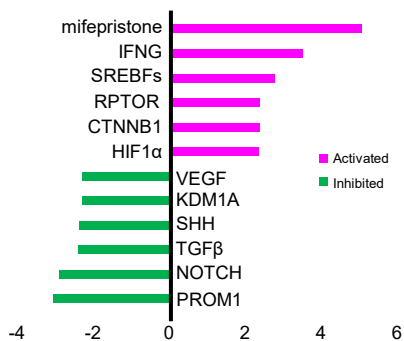

**d**

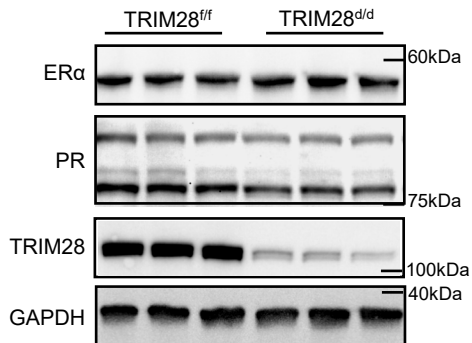

**e**

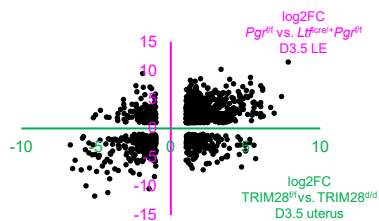

**f**

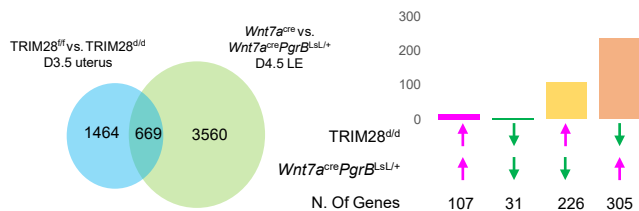

**Supplementary Fig. 4.** TRIM28 altered molecular signaling in D3.5 mouse uterus. **a.** Realtime PCR of PR target genes: *Ihh*, *Nr2f2*, *Hand2*, *Il13ra2*, *Areg*, *Hdc*; gland specific genes *Lif*, *Lifr*, *Il6st*, *Foxa2*, *Spink3* and estrogen specific genes *Ramp3*, *Ltf*, *Inhbb*, *Greb1*, *Cftr*. N=6 biologically independent samples per group. **b.** Immunohistochemistry of FOXA2 and MUC1. **c.** Top altered pathways in TRIM28<sup>Δ/Δ</sup> uterine transcriptome. **d.** Western blot of ERα, PR, TRIM28 and GAPDH in the mouse uterus. The western blot were performed in three different mice per group with similar results. **e.** The correlations of DEG fold changes between TRIM28<sup>Δ/Δ</sup> and epithelial PR knockout (*Ltf<sup>cre/+</sup>Pgr<sup>fl/fl</sup>*). **f.** The overlapped DEGs between TRIM28<sup>Δ/Δ</sup> and epithelial PRB overexpressed (*Wnt7a<sup>cre</sup>PgrB<sup>LSL/+</sup>*) uterus. Two-sided student's t test. \*p<0.05.

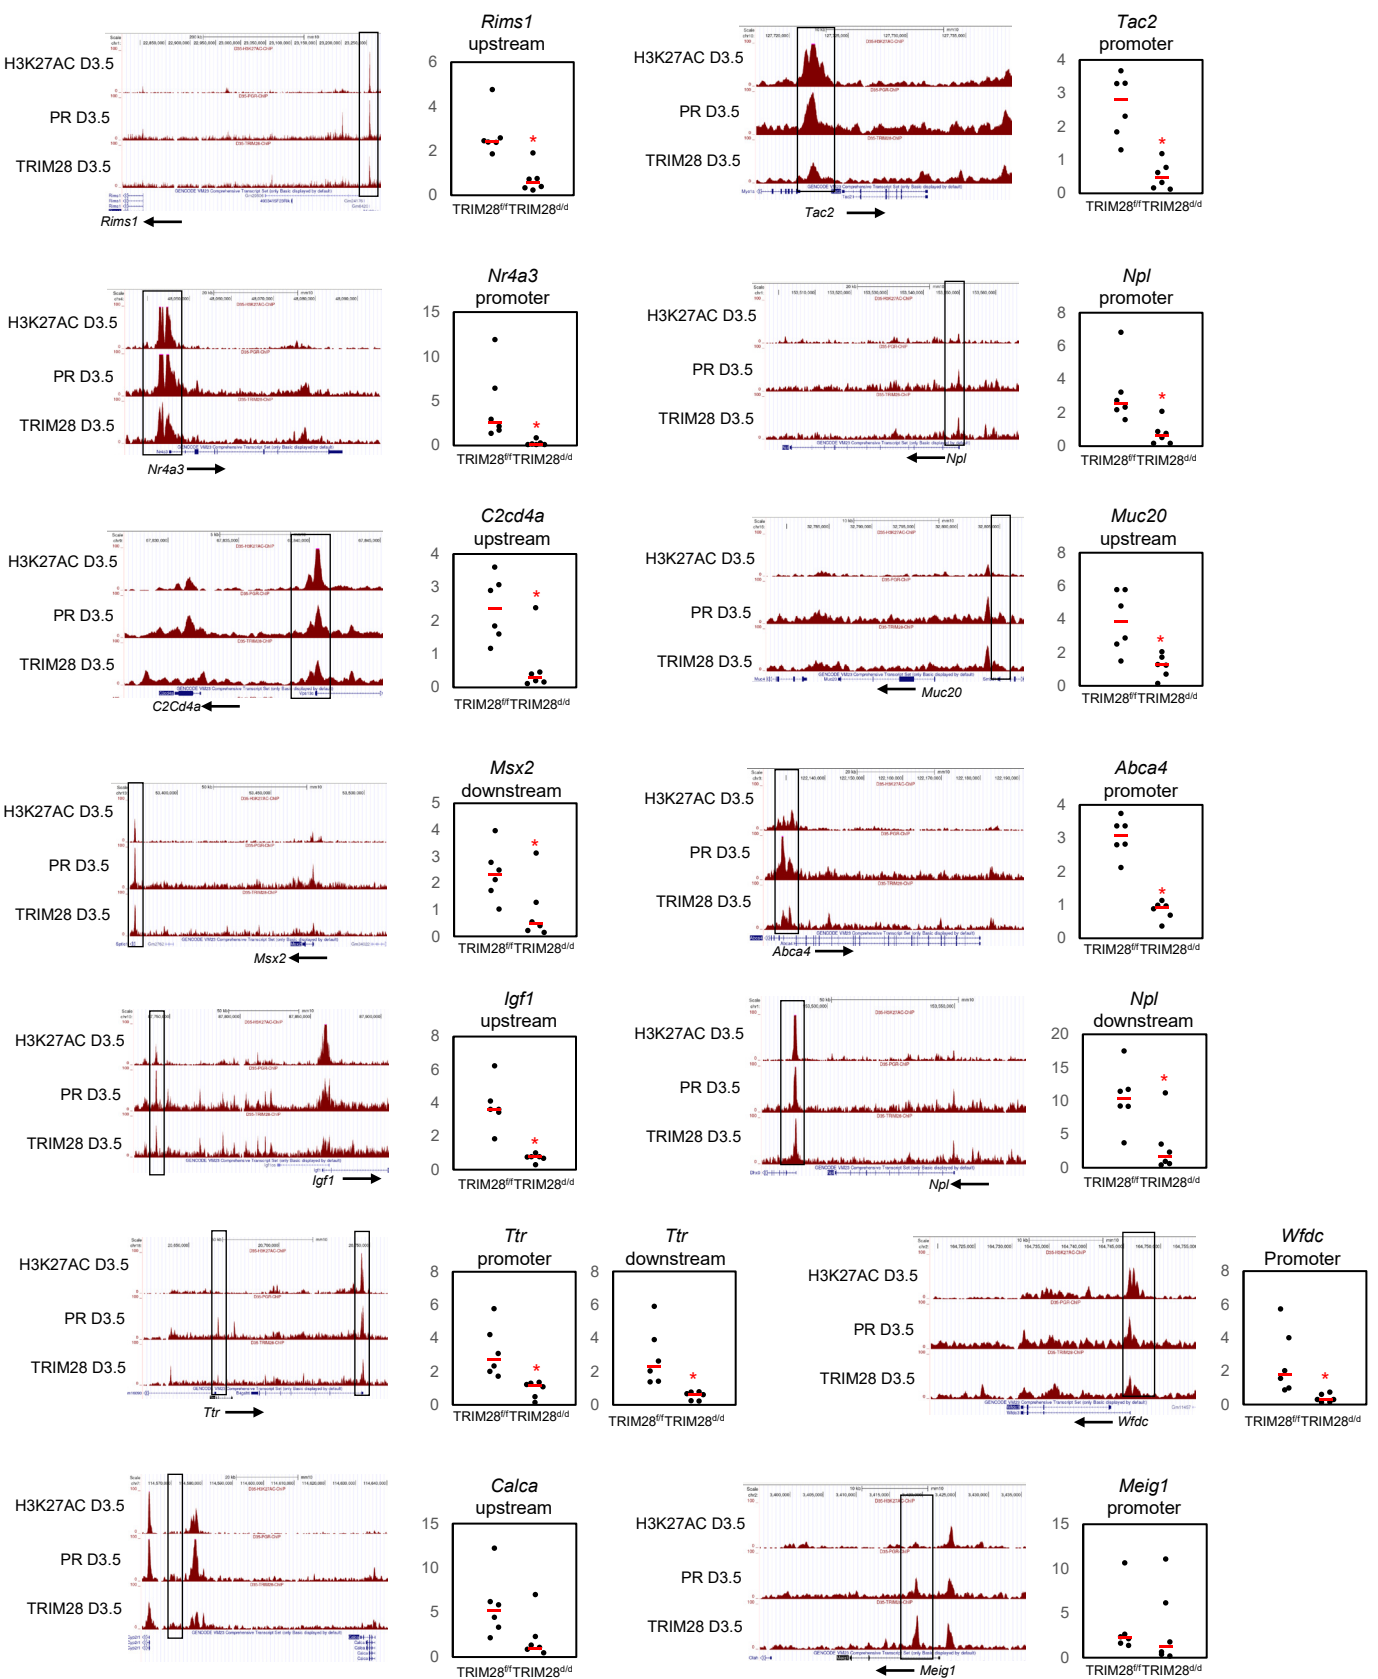

**Supplementary Fig. 5.** The genome browser of PR, TRIM28, H3K27AC ChIP-Seq, and PR ChIP-qPCR in D3.5 TRIM28<sup>fl/fl</sup> and TRIM28<sup>ΔΔ</sup> uterus. N=6 biologically independent samples per group. Two-sided student's t test. \*p<0.05.

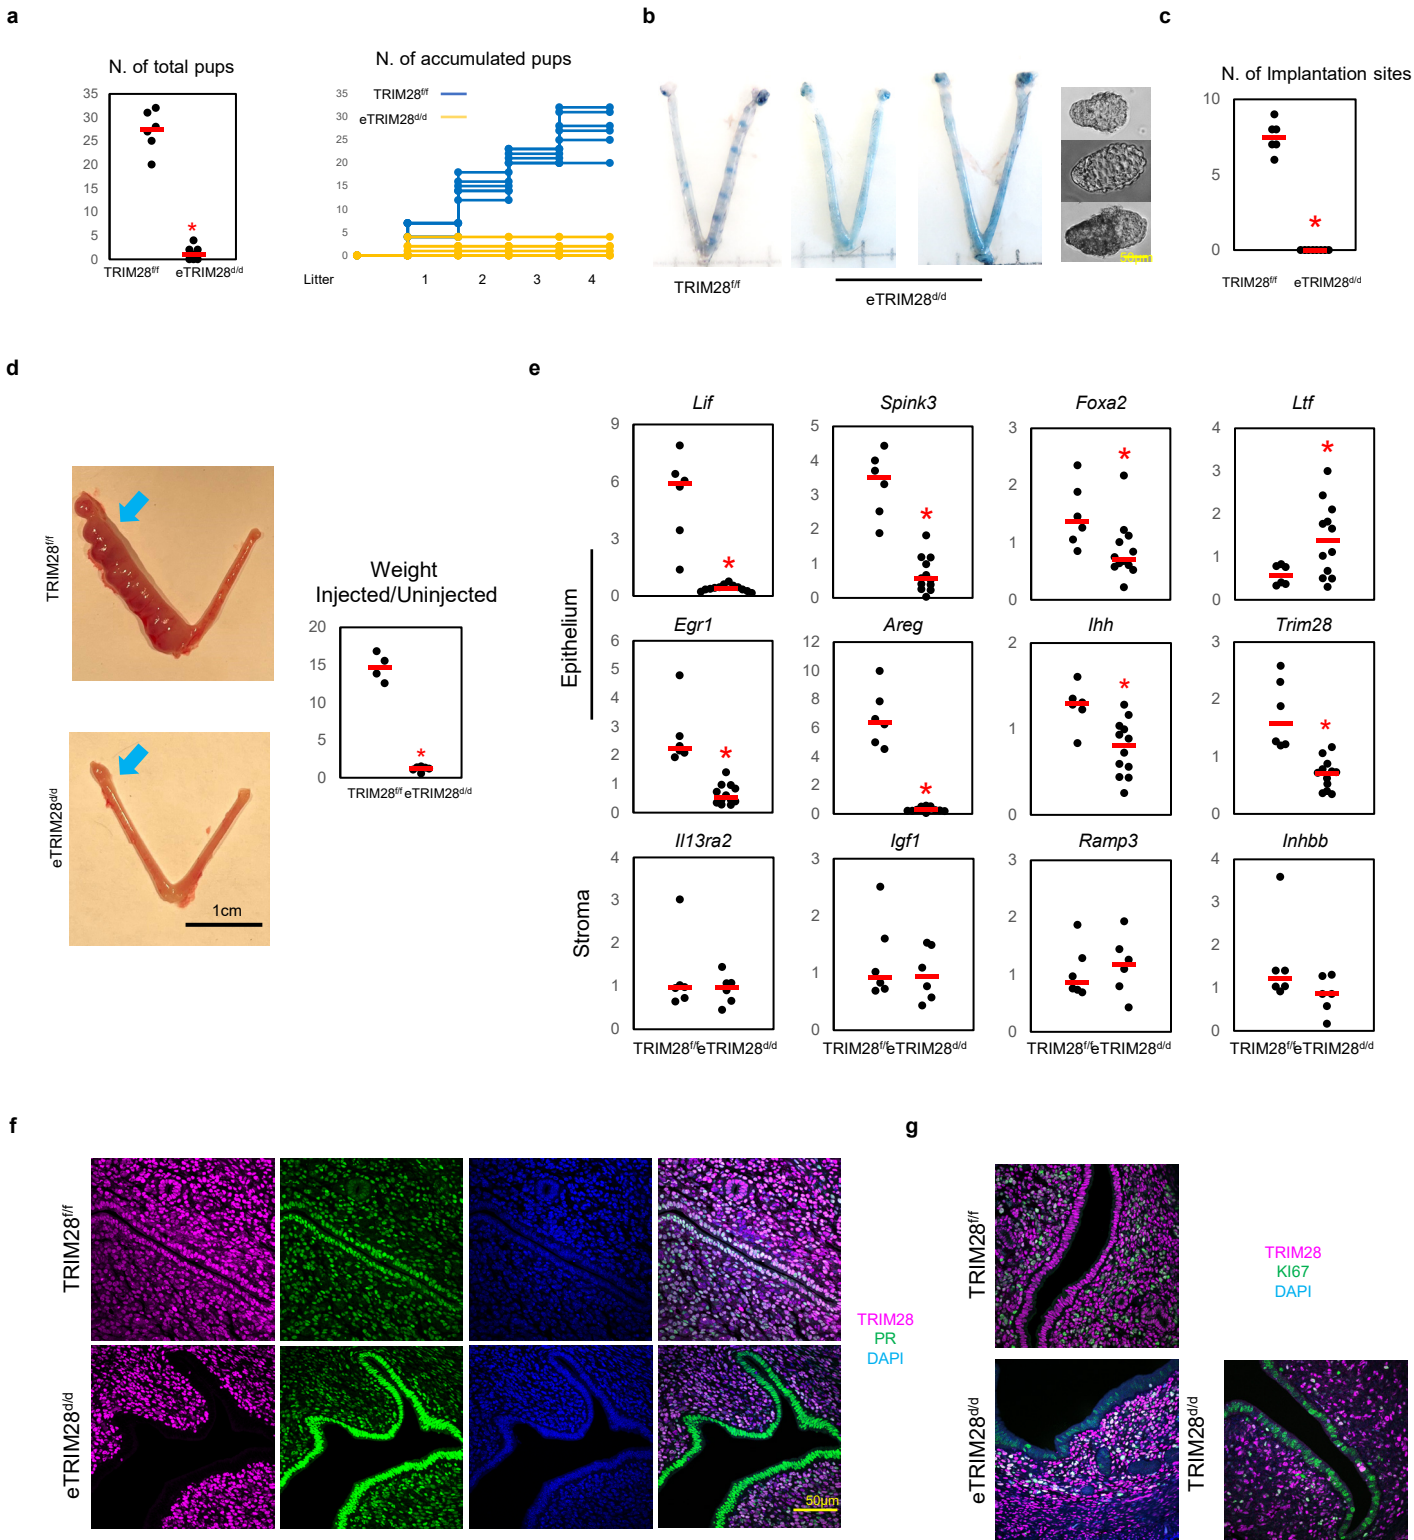

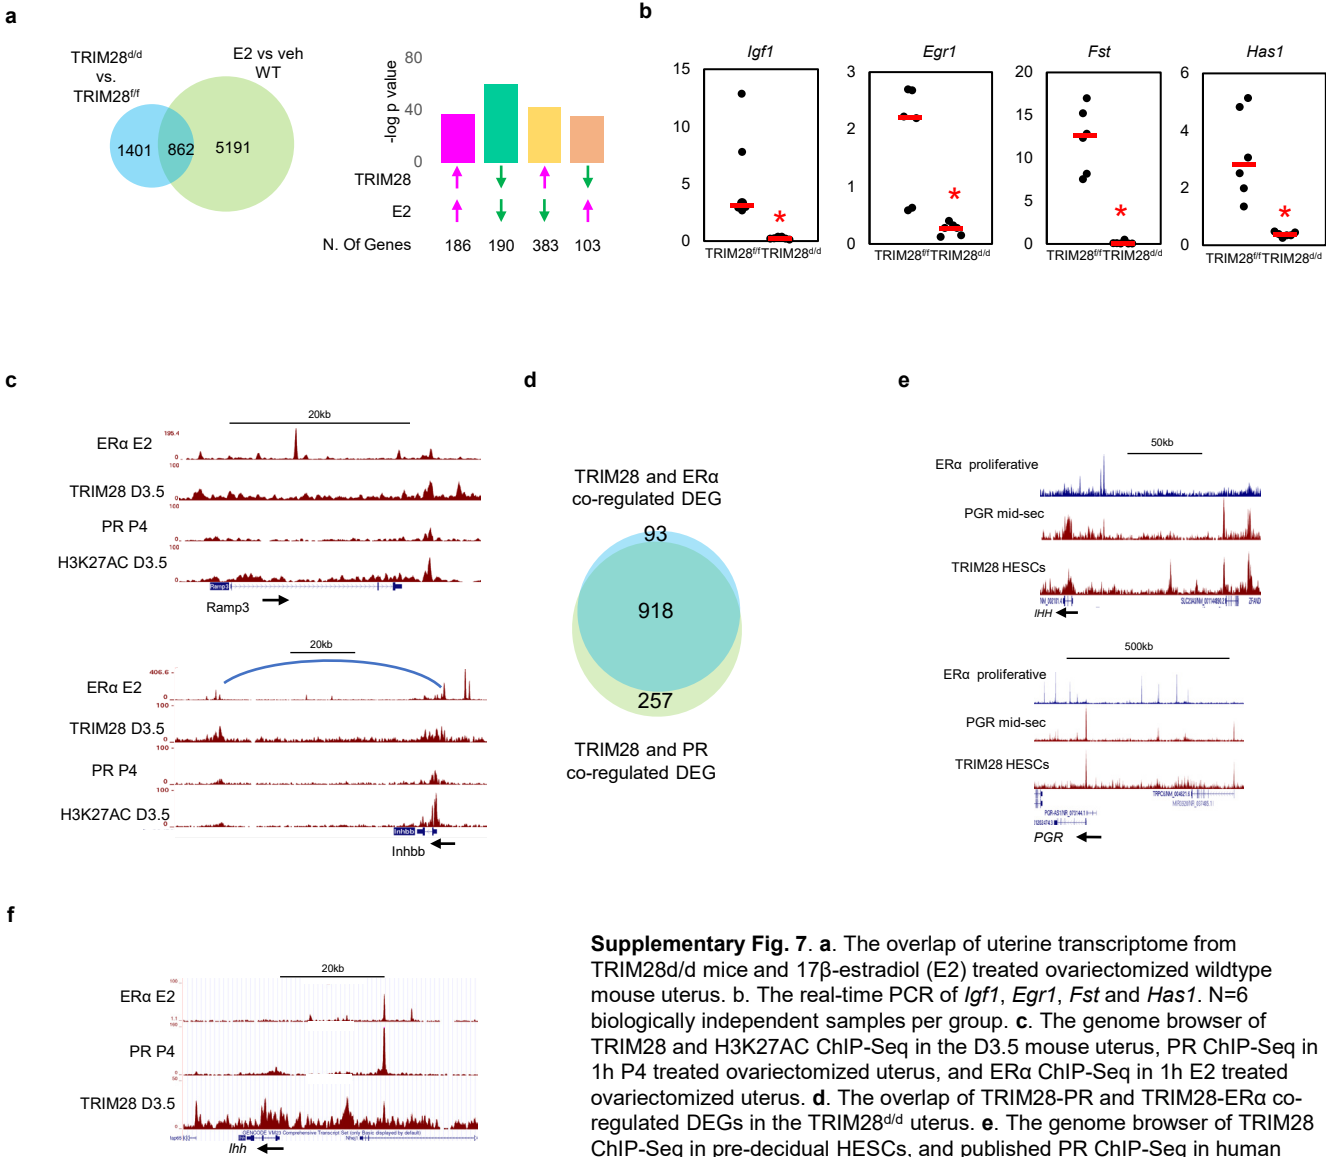

**Supplementary Fig. 7.** a. The overlap of uterine transcriptome from TRIM28<sup>did</sup> mice and 17 $\beta$ -estradiol (E2) treated ovariectomized wildtype mouse uterus. b. The real-time PCR of *Igf1*, *Egr1*, *Fst* and *Has1*. N=6 biologically independent samples per group. c. The genome browser of TRIM28 and H3K27AC ChIP-Seq in the D3.5 mouse uterus, PR ChIP-Seq in 1h P4 treated ovariectomized uterus, and ER $\alpha$  ChIP-Seq in 1h E2 treated ovariectomized uterus. d. The overlap of TRIM28-PR and TRIM28-ER $\alpha$  co-regulated DEGs in the TRIM28<sup>did</sup> uterus. e. The genome browser of TRIM28 ChIP-Seq in pre-decidual HESCs, and published PR ChIP-Seq in human endometrium at mid-secretory phase, ER $\alpha$  ChIP-Seq in human endometrium at proliferative phase. f. The genome browser of TRIM28 in the D3.5 mouse uterus, PR ChIP-Seq in 1h P4 treated ovariectomized uterus, and ER $\alpha$  ChIP-Seq in 1h E2 treated ovariectomized uterus at *Ihh* 19kb enhancer. Two-sided student's t test. \*p<0.05.

a

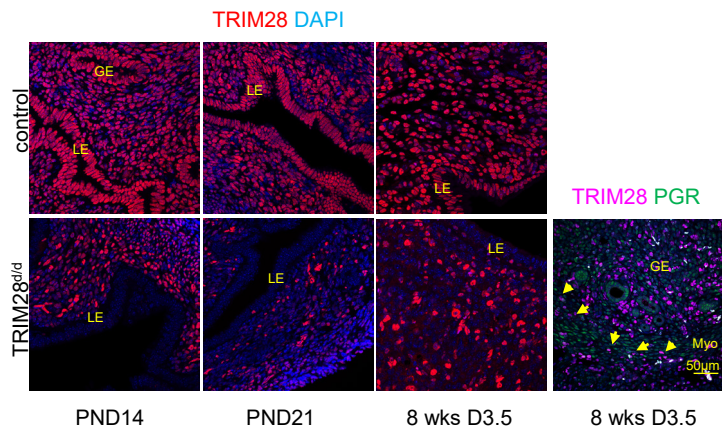

b

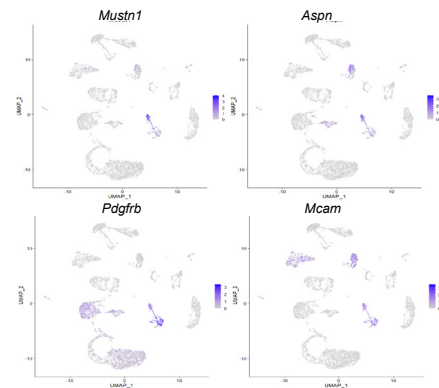

c

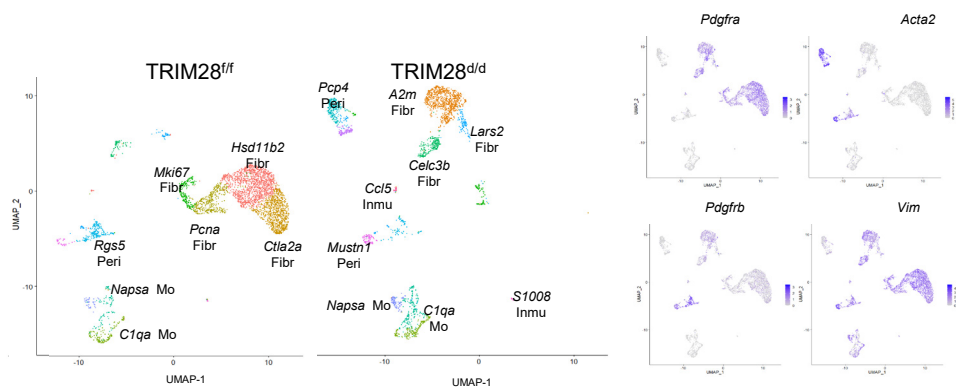

d

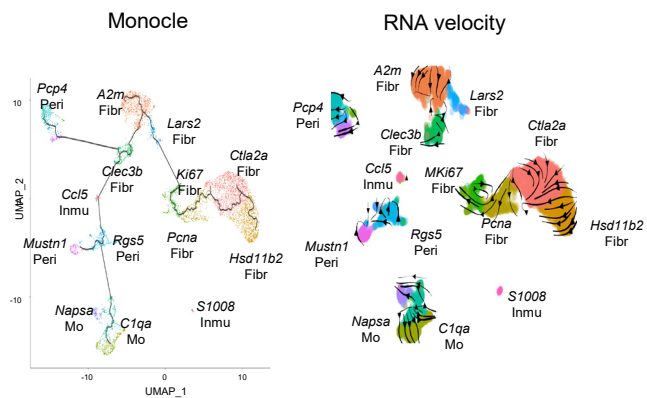

**Supplementary Fig. 8.** Altered cell clusters in the TRIM28<sup>del/del</sup> mouse uterus. **a.** Immunofluorescence (IF) of TRIM28 at PND14, PND21, and 8 weeks old D3.5 TRIM28<sup>ff/ff</sup> and TRIM28<sup>del/del</sup> mouse uterus. The arrows pointed to the TRIM28 and PGR double positive cells in the myometrium. **b.** The feature plot of *Mustn1*, *Aspn*, *Pdgfrb*, *Mcam* of single cells from the D3.5 TRIM28<sup>ff/ff</sup> and TRIM28<sup>del/del</sup> uterus. **c.** The UMAP and the feature plot of *Pdgfra*, *Acta2*, *Pdgfrb*, *Vim* and in the mesenchymal cells re-clustered from the D3.5 TRIM28<sup>ff/ff</sup> and TRIM28<sup>del/del</sup> uterus. **d.** Single cell trajectory predicted by Monocle and RNA velocity in TRIM28<sup>ff/ff</sup> and TRIM28<sup>del/del</sup> mesenchymal clusters. N=3-4 mice per group. Fibr: Fibroblast; Peri: Pericytes; Mo: Myeloid; Immun: Immune cells; LE: Luminal epithelium; The IF was repeated in three different mice per group with similar results.



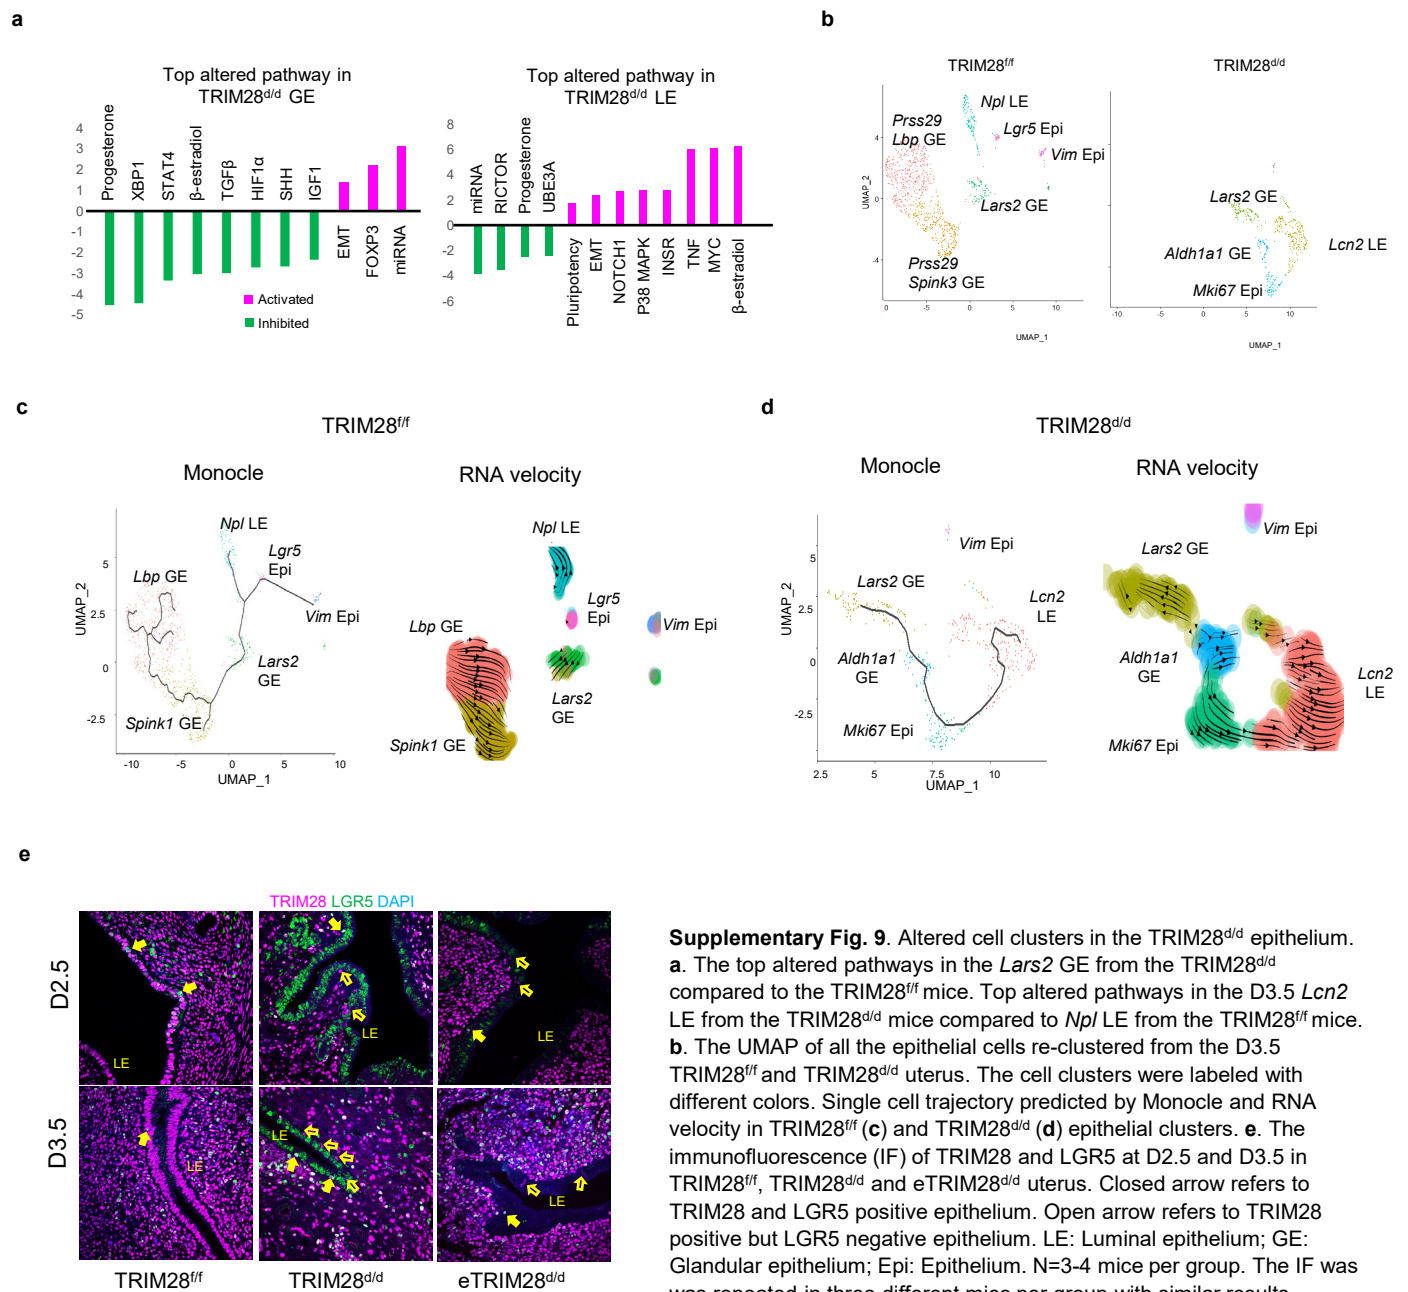

Supplement: 41467_2023_40395_MOESM1_ESM.pdf [file 41467_2023_40395_MOESM1_ESM.pdf]
