# Supplementary material for: TRIM28 modulates nuclear receptor signaling to regulate uterine function
Source: PubMed Central journal article supplement (PMC10393996; doi:10.1038/s41467-023-40395-7), 2023-08-01
Supplement: 41467_2023_40395_MOESM10_ESM.pdf [file 41467_2023_40395_MOESM10_ESM.pdf]

# Gel Images for Figure 1

TRIM28 antibody: ab22553 abcam

HA antibody: 3724, Cell signaling

TRIM28 antibody: ab109545 Abcam

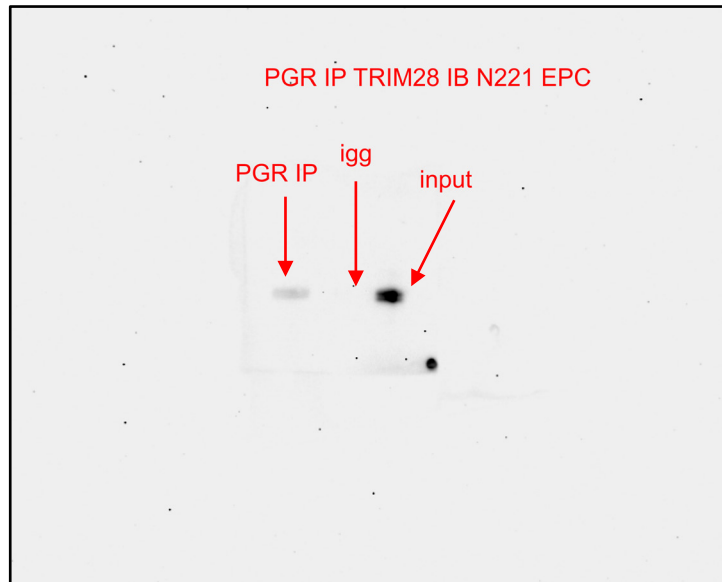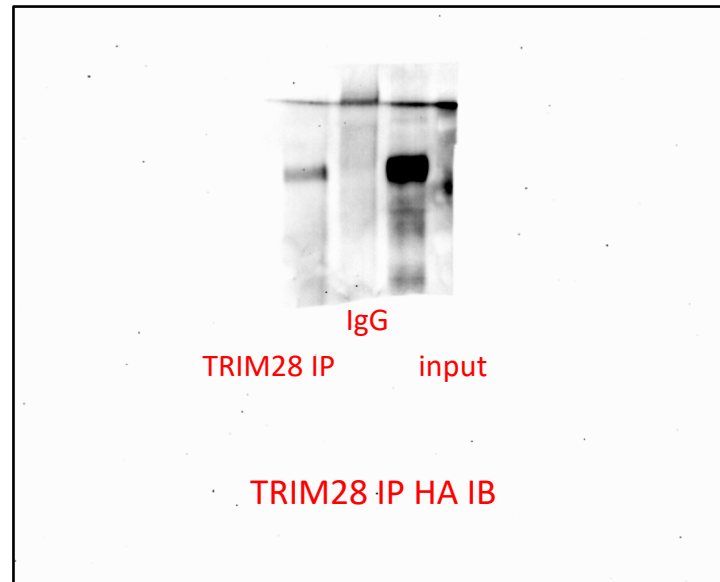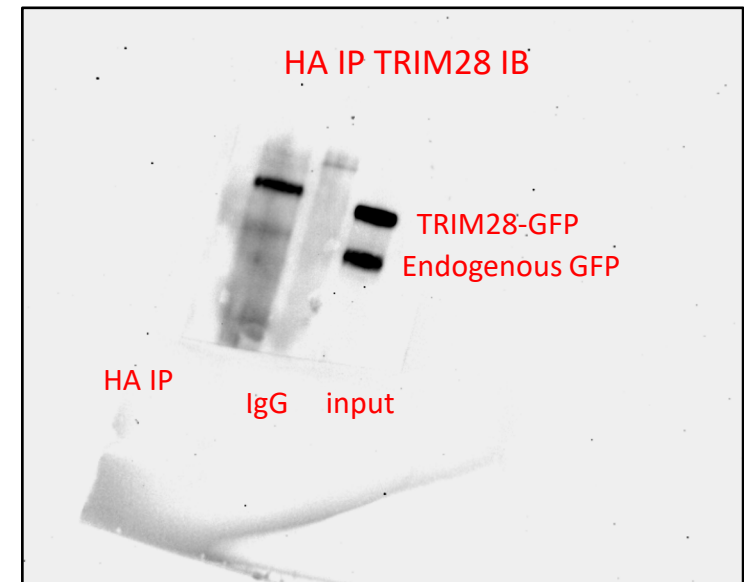

# Gel Images for Figure 6

TRIM28 antibody: ab22553 abcam

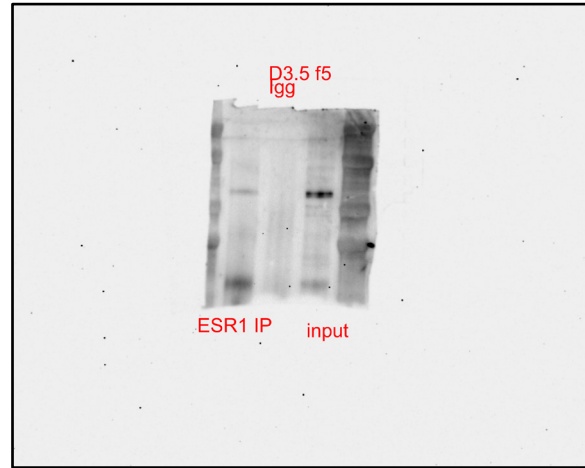

ESR1 antibody: 06-936 Milipore

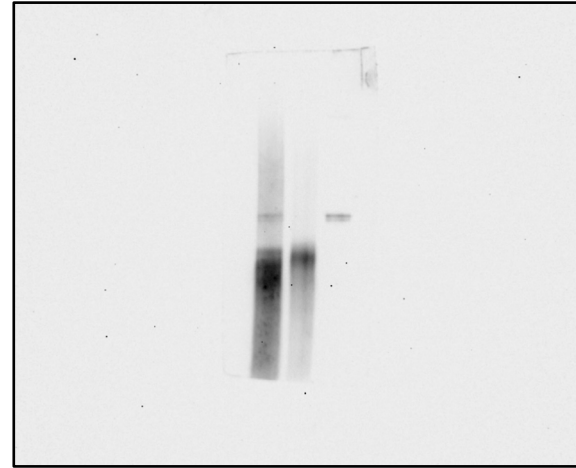

TRIM28 antibody: ab22553 abcam

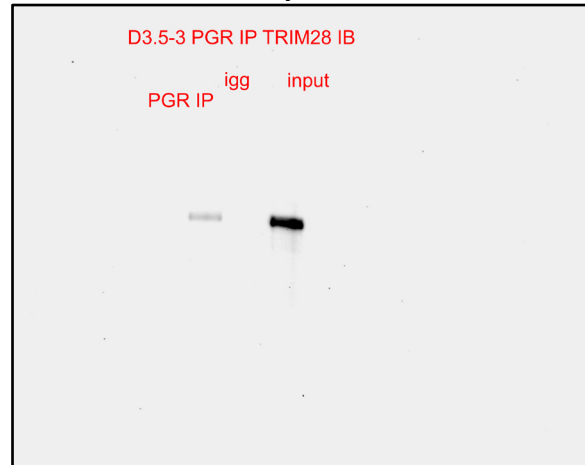

ESR1 antibody: 06-936 Milipore

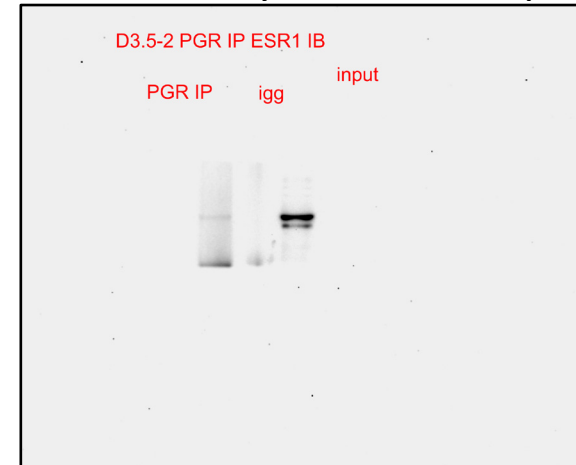

# Gel Images for Supplementary Figure 4

TRIM28 antibody: ab109545 Abcam

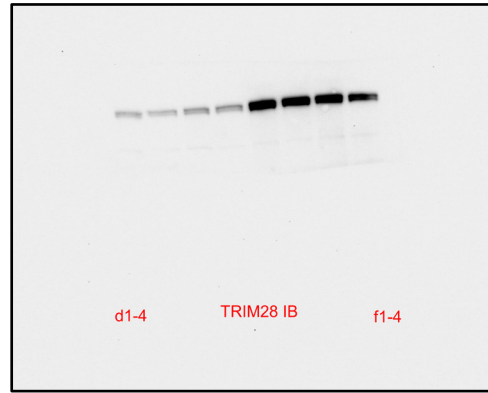

PGR antibody: 1294 Agilent

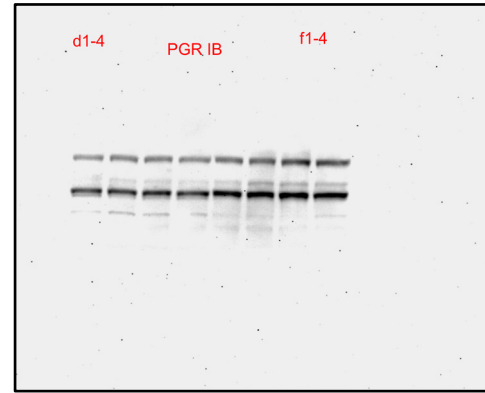

ER $\alpha$  antibody: 06-935 Millipore

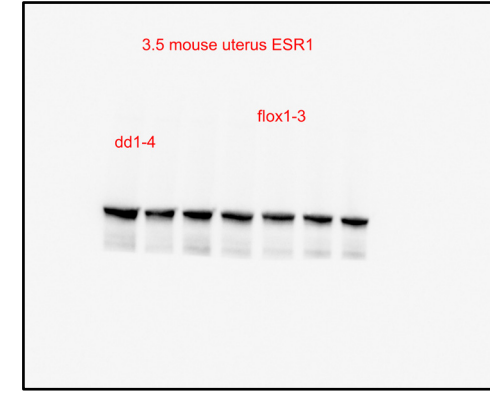

$\beta$ -actin antibody: A5316 Sigma

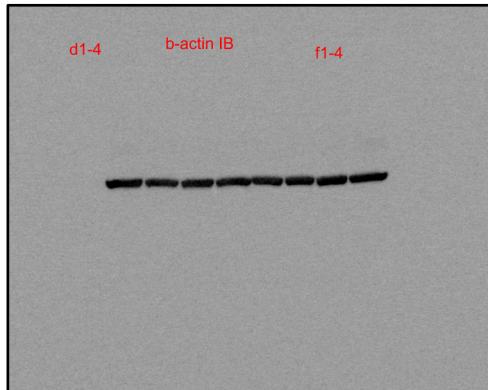

$\beta$ -actin antibody: A5316 Sigma

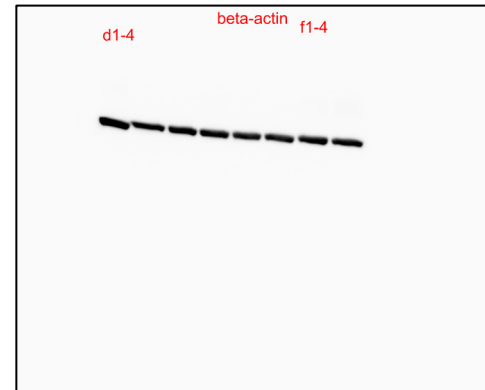

GAPDH antibody: 5174 Cell signaling

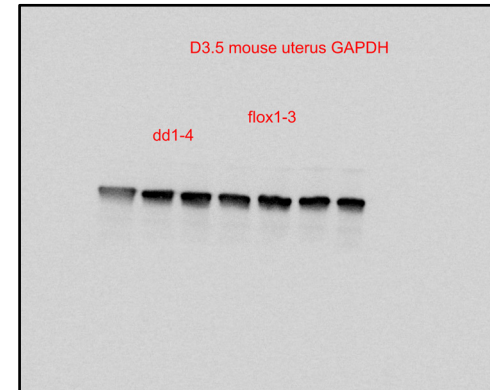

Only one one loading control gel image, GAPDH was shown in the Supplementary figure 4.
